# Supplementary material
Source: PubMed Central journal article supplement (PMC3745561)
Supplement: psb-8-e22535-s01.pdf [file psb-8-e22535-s01.pdf]

## **Supplemental Material to:**

**Suhas Shinde, Rupali Shinde, Frances Downey and Carl Ng**

**Abiotic stress-induced oscillations in steady-state  
transcript levels of Group 3 LEA protein genes in the moss,  
*Physcomitrella patens***

**Plant Signaling & Behavior 2012; 8(1)**

**<http://dx.doi.org/10.4161/psb.22535>**

**<http://www.landesbioscience.com/journals/psb/article/22535>**

**Supplementary Table 1. Primer sequences and PCR amplification efficiency in qPCR analysis.** Comparative analysis of PCR amplification efficiency of each primer set in qPCR determined by standard curve analysis. Slope value of standard curve of each primer set is generated by cycle (Ct) values on the y-axis versus the log of the dilutions on the x-axis for each primer set.

| Gene ID      | Primer Sequence                                          | Slope Value | Eamp. | Eamp. (%) |
|--------------|----------------------------------------------------------|-------------|-------|-----------|
| 18srRNA      | 5'-AAACGGCTACCACATCCAAG-3'<br>5'-CCTCCAATGGATCCTCGTTA-3' | -3.514      | 1.926 | 92.57     |
| Actin        | 5'-TTTCAGCACACTCCCTTCCC-3'                               | -3.515      | 1.925 | 92.54     |
| Phypa_109052 | 5'- AACCATAGTCATCTGCGAAATAAAC-3'                         |             |       |           |
| Tubulin      | 5'-ATTGCCAGGAGCTGTGTACC-3'                               | -3.340      | 1.992 | 99.24     |
| Phypa_170860 | 5'-ACTGCTCCTTCGTCTGCATC-3'                               |             |       |           |
| Group 3 LEA  | 5'-GCAGACTGGCAACTATGTGTCCGA-3'                           | -3.546      | 1.914 | 91.42     |
| Phypa_166566 | 5'-ATCCCACTCAACCCTACTGTTTGG-3'                           |             |       |           |
| Group 3 LEA  | 5'-TGCTTCAACCATGCTAGTTAGGCG-3'                           | -3.579      | 1.903 | 90.27     |
| Phypa_211998 | 5'-TCCACCTGGATCTACGGAAGTTGA-3'                           |             |       |           |
| GST          | 5'-GTACTIONGCAAAGCAACCATTCGG-3'                          | -3.579      | 1.903 | 90.27     |
| Phypa_184622 | 5'-CGCATTATTGCGCCAGACTCGAAC-3'                           |             |       |           |
